# Supplementary material for: iTRAQ-Based Proteomic and Physiological Analyses Reveal the Mechanisms of Dehydration and Cryopreservation Tolerance of Sophora tonkinensis Gagnep. Seeds
Source: MDPI journal article supplement (doi:10.3390/plants12091842), 2023-04-29
Supplement: s1 [file s1]

Supplementary Materials

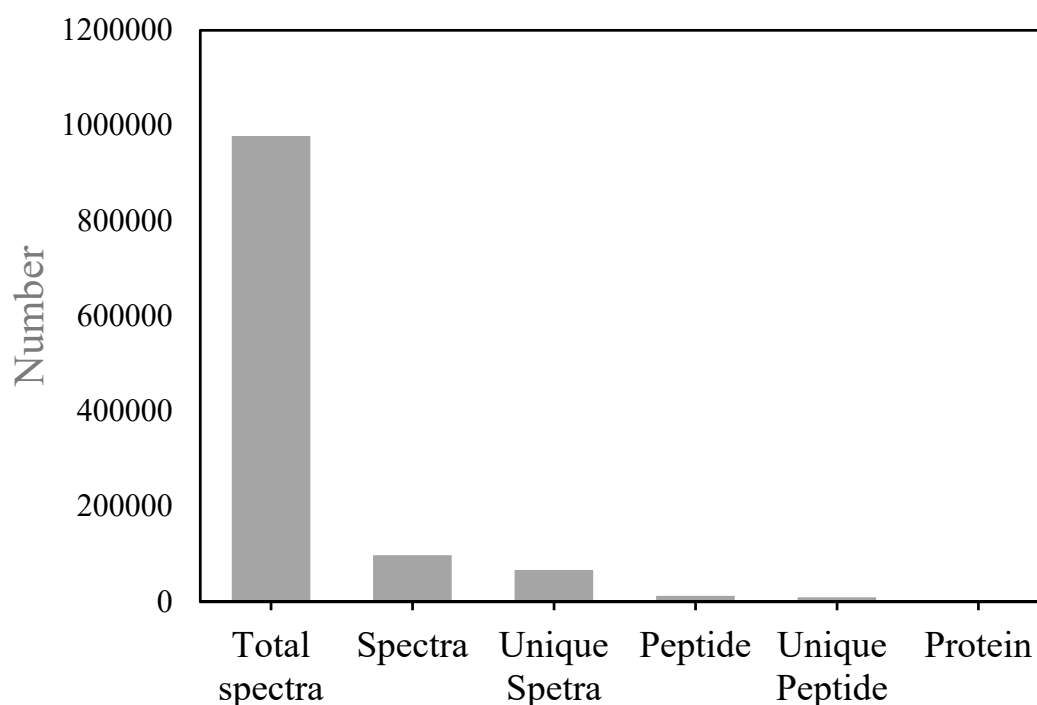

**Figure S1.** Spectra, peptides, unique peptides, and proteins identified from iTRAQ proteomics after searching against the *Sophora tonkinensis* databases.

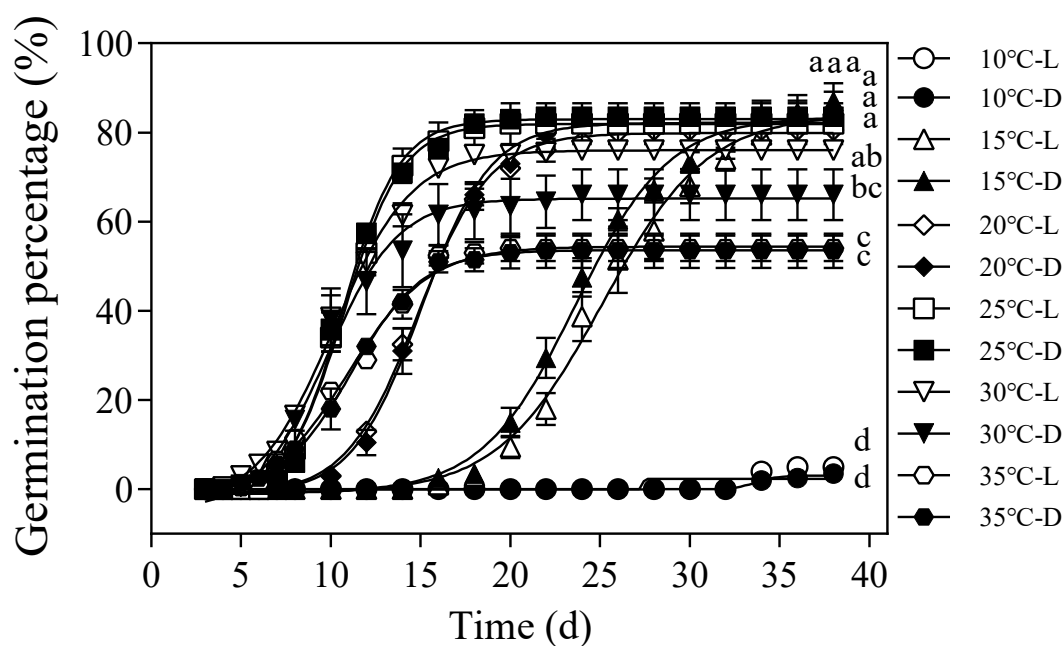

**Figure S2.** Germination process of fresh mature *Sophora tonkinensis* seeds under constant temperature and alternating light / dark conditions (L is the light condition and D is the dark condition).
